# Supplementary material for: An Efficient Prephenate Dehydrogenase Gene for the Biosynthesis of L-tyrosine: Gene Mining, Sequence Analysis, and Expression Optimization
Source: MDPI journal article supplement (doi:10.3390/foods12163084), 2023-08-17
Supplement: s1 [file s1]

**Table S1. Primers used in this study.**

| Primer name               | Sequence of primer (5' to 3')                          |
|---------------------------|--------------------------------------------------------|
| pHY300-F                  | GTTTATTATCCATACCCTTAC                                  |
| pHY300-R                  | CAGATTTCGTGATGCTTGTC                                   |
| P43- <i>Bao-tyrA</i> -F   | <b>CGGGATC</b> CTGATAGGTGGTATGTTTTCGC                  |
| P43- <i>Bao-tyrA</i> -R   | CAAGCAATATTGTGTCCTTCATGTGTACATTCCTCTCTTACCTATAA        |
| <i>Bao-tyrA</i> -F        | TTATAGGTAAGAGAGGAATGTACACATGAAGGACACAATATTGCTTG        |
| <i>Bao-tyrA</i> -R        | AATCCGTCCTCTCTGCTCTTTTCAGTCAGCGTAAAATGTTTCA            |
| TamyL- <i>Bao-tyrA</i> -F | TGAAACATTTTACGCTGACTGAAAGAGCAGAGAGGACGGATT             |
| TamyL- <i>Bao-tyrA</i> -R | <b>GCTCTAGAC</b> CGCAATAATGCCGTCG                      |
| P43- <i>Eco-tyrA</i> -F   | <b>CGGAATT</b> CTGATAGGTGGTATGTTTTCGC                  |
| P43- <i>Eco-tyrA</i> -R   | CGGTCAATTCAGCAACCATGTGTACATTCCTCTCTTACCTATAA           |
| <i>Eco-tyrA</i> -F        | TTATAGGTAAGAGAGGAATGTACACATGGTTGCTGAATTGACCG           |
| <i>Eco-tyrA</i> -R        | AATCCGTCCTCTCTGCTCTTTTACTGGCGATTGTCATTG                |
| TamyL- <i>Eco-tyrA</i> -F | CGAATGACAATCGCCAGTAAAAGAGCAGAGAGGACGGATT               |
| TamyL- <i>Eco-tyrA</i> -R | <b>GCTCTAGAC</b> CGCAATAATGCCGTCG                      |
| P43- <i>Bld-tyrA</i> -F   | <b>CGGGATC</b> CTGATAGGTGGTATGTTTTCGC                  |
| P43- <i>Bld-tyrA</i> -R   | CGTTTCATTCGGTTGAGTCATGTGTACATTCCTCTCTTACCTATAA         |
| <i>Bld-tyrA</i> -F        | TTATAGGTAAGAGAGGAATGTACACATGACTCAACCGAATGAAACG         |
| <i>Bld-tyrA</i> -R        | AATCCGTCCTCTCTGCTCTTTCAATCAGCATAAAATGTTTCG             |
| TamyL- <i>Bld-tyrA</i> -F | CGAAACATTTTATGCTGATTGAAAGAGCAGAGAGGACGGATT             |
| TamyL- <i>Bld-tyrA</i> -R | <b>GCTCTAGAC</b> CGCAATAATGCCGTCG                      |
| P43- <i>Bsu-tyrA</i> -F   | <b>CGGGATC</b> CTGATAGGTGGTATGTTTTCGC                  |
| P43- <i>Bsu-tyrA</i> -R   | ATATTGTATCTTTCATTTGATTCATGTGTACATTCCTCTCTTACCTATAA     |
| <i>Bsu-tyrA</i> -F        | TTATAGGTAAGAGAGGAATGTACACATGAATCAAATGAAAGATACAA<br>TAT |
| <i>Bsu-tyrA</i> -R        | AATCCGTCCTCTCTGCTCTTTCAATCAGCATAAAAAGTTTCATAT          |
| TamyL- <i>Bsu-tyrA</i> -F | ATATGAAACTTTTTATGCTGATTGAAAGAGCAGAGAGGACGGATT          |
| TamyL- <i>Bsu-tyrA</i> -R | <b>GCTCTAGAC</b> CGCAATAATGCCGTCG                      |
| P43- <i>Cgb-tyrA</i> -F   | <b>CGGAATT</b> CTGATAGGTGGTATGTTTTCGC                  |
| P43- <i>Cgb-tyrA</i> -R   | ACCTGACAAGTGTGGCACATGTGTACATTCCTCTCTTACCTATAA          |
| <i>Cgb-tyrA</i> -F        | TTATAGGTAAGAGAGGAATGTACACATGTGCCACACTTGTCAGGT          |
| <i>Cgb-tyrA</i> -R        | AATCCGTCCTCTCTGCTCTTCTAGAACACTTCGATCCGTGC              |
| TamyL- <i>Cgb-tyrA</i> -F | GCACGGATCGAAGTGTTCTAGAAGAGCAGAGAGGACGGATT              |
| TamyL- <i>Cgb-tyrA</i> -R | <b>GCTCTAGAC</b> CGCAATAATGCCGTCG                      |
| P43- <i>Btb-tyrA</i> -F   | <b>CGGGATC</b> CTGATAGGTGGTATGTTTTCGC                  |
| P43- <i>Btb-tyrA</i> -R   | CAATTAATACTACCTTTTTACGCATGTGTACATTCCTCTCTTACCTATA<br>A |
| <i>Btb-tyrA</i> -F        | TTATAGGTAAGAGAGGAATGTACACATGCGTAAAAAGGTAGTATTAA<br>TTG |
| <i>Btb-tyrA</i> -R        | AATCCGTCCTCTCTGCTCTTTTAAATTGTTTCATAAGTTTGGTAT          |
| TamyL- <i>Btb-tyrA</i> -F | ATACCAAACCTTATGAAACAATTTAAAAGAGCAGAGAGGACGGATT         |

---

|                            |                                                    |
|----------------------------|----------------------------------------------------|
| TamyL- <i>Btb-tyrA</i> -R  | <b>GCTCTAGACGCAATAATGCCGTCG</b>                    |
| P43- <i>Bpum-tyrA</i> -F   | <b>CGGGATCCTGATAGGTGGTATGTTTTCGC</b>               |
| P43- <i>Bpum-tyrA</i> -R   | GGTTTTCGTTTTGCTTCATTCATGTGTACATTCCTCTCTTACCTATAA   |
| <i>Bpum-tyrA</i> -F        | TTATAGGTAAGAGAGGAATGTACACATGAATGAAGCAAACGAAACC     |
| <i>Bpum-tyrA</i> -R        | AATCCGTCCTCTCTGCTCTTTCAATCAGCATAAAATGTATCGTA       |
| TamyL- <i>Bpum-tyrA</i> -F | TACGATACATTTTATGCTGATTGAAAGAGCAGAGAGGACGGATT       |
| TamyL- <i>Bpum-tyrA</i> -R | <b>GCTCTAGACGCAATAATGCCGTCG</b>                    |
| P43- <i>Sce-tyrA</i> -F    | <b>CGGGATCCTGATAGGTGGTATGTTTTCGC</b>               |
| P43- <i>Sce-tyrA</i> -R    | CTCAATCTTATCCTCTGATACCATGTGTACATTCCTCTCTTACCTATAA  |
| <i>Sce-tyrA</i> -F         | TTATAGGTAAGAGAGGAATGTACACATGGTATCAGAGGATAAGATTGAG  |
| <i>Sce-tyrA</i> -R         | AATCCGTCCTCTCTGCTCTTTTATGTATTTCTTTTTTCAGCGG        |
| TamyL- <i>Sce-tyrA</i> -F  | CCGCTGAAAAAAGAAATACATAAAAGAGCAGAGAGGACGGATT        |
| TamyL- <i>Sce-tyrA</i> -R  | <b>GCTCTAGACGCAATAATGCCGTCG</b>                    |
| P43- <i>Bcoa-tyrA</i> -F   | <b>CGGGATCCTGATAGGTGGTATGTTTTCGC</b>               |
| P43- <i>Bcoa-tyrA</i> -R   | ATCACAAACACATTTCTTTTCATGTGTACATTCCTCTCTTACCTATAA   |
| <i>Bcoa-tyrA</i> -F        | TTATAGGTAAGAGAGGAATGTACACATGAAAGGAAATGTGTTTGTGAT   |
| <i>Bcoa-tyrA</i> -R        | AATCCGTCCTCTCTGCTCTTCTATTGGATATAGACTTCATGCG        |
| TamyL- <i>Bcoa-tyrA</i> -F | CGCATGAAGTCTATATCCAATAGAAGAGCAGAGAGGACGGATT        |
| TamyL- <i>Bcoa-tyrA</i> -R | <b>GCTCTAGACGCAATAATGCCGTCG</b>                    |
| P43- <i>Lpt-tyrA</i> -F    | <b>CGGGATCCTGATAGGTGGTATGTTTTCGC</b>               |
| P43- <i>Lpt-tyrA</i> -R    | ACCTTTGATCAATACAGTTGTCATGTGTACATTCCTCTCTTACCTATAA  |
| <i>Lpt-tyrA</i> -F         | TTATAGGTAAGAGAGGAATGTACACATGACAACTGTATTGATCAAAGGT  |
| <i>Lpt-tyrA</i> -R         | AATCCGTCCTCTCTGCTCTTTTAAATTCCTCCTTACAATCTGATAA     |
| TamyL- <i>Lpt-tyrA</i> -F  | TTATCAGATTGTAAGGAGGAATTAAGAGCAGAGAGGACGGATT        |
| TamyL- <i>Lpt-tyrA</i> -R  | <b>GCTCTAGACGCAATAATGCCGTCG</b>                    |
| P43- <i>Bce-tyrA</i> -F    | <b>CGGGATCCTGATAGGTGGTATGTTTTCGC</b>               |
| P43- <i>Bce-tyrA</i> -R    | CAATTAATACTACCTTTTTACGCATGTGTACATTCCTCTCTTACCTATAA |
| <i>Bce-tyrA</i> -F         | TTATAGGTAAGAGAGGAATGTACACATGCGTAAAAAGGTAGTATTAAATG |
| <i>Bce-tyrA</i> -R         | AATCCGTCCTCTCTGCTCTTTTAAATTGTTTCATAAGTTTGGTAT      |
| TamyL- <i>Bce-tyrA</i> -F  | ATACCAAACCTTATGAAACAATTTAAAAGAGCAGAGAGGACGGATT     |
| TamyL- <i>Bce-tyrA</i> -R  | <b>GCTCTAGACGCAATAATGCCGTCG</b>                    |
| P43- <i>Bmh1-tyrA</i> -F   | <b>CGGGATCCTGATAGGTGGTATGTTTTCGC</b>               |
| P43- <i>Bmh1-tyrA</i> -R   | CTATAACAAAAACATTTTCTTTACGTGTACATTCCTCTCTTACCTATAA  |

---

---

|                                |                                                       |
|--------------------------------|-------------------------------------------------------|
| <i>Bmh1-tyrA-F</i>             | TTATAGGTAAGAGAGGAATGTACACGTGAAAGAAAATGTTTTGTTA<br>TAG |
| <i>Bmh1-tyrA-R</i>             | AATCCGTCCTCTCTGCTCTTTTAAGAAATAAACGTCTGATATTGA         |
| <i>TamyL-Bmh1-tyrA-F</i>       | TCAATATCAGACGTTTATTTCTTAAAAGAGCAGAGAGGACGGATT         |
| <i>TamyL-Bmh1-tyrA-R</i>       | <b>GCTCTAGACGCAATAATGCCGTCG</b>                       |
| <i>P43-Bmh2-tyrA-F</i>         | <b>CGGGATCCT</b> GATAGGTGGTATGTTTTCGC                 |
| <i>P43-Bmh2-tyrA-R</i>         | GCCGAAAATAGCAATCTTCATGTGTACATTCCCTCTCTTACCTATAA       |
| <i>Bmh2-tyrA-F</i>             | TTATAGGTAAGAGAGGAATGTACACATGAAGATTGCTATTTTCGGC        |
| <i>Bmh2-tyrA-R</i>             | AATCCGTCCTCTCTGCTCTTTCACACCACCACTTTATAGCC             |
| <i>TamyL-Bmh2-tyrA-F</i>       | GGCTATAAAGTGGTGGTGTGAAAGAGCAGAGAGGACGGATT             |
| <i>TamyL-Bmh2-tyrA-R</i>       | <b>GCTCTAGACGCAATAATGCCGTCG</b>                       |
| <i>P43-Zmc-tyrA-F</i>          | <b>CGGGATCCT</b> GATAGGTGGTATGTTTTCGC                 |
| <i>P43-Zmc-tyrA-R</i>          | CAATATGCTTAAAGACGGTCACGTGTACATTCCCTCTCTTACCTATAA      |
| <i>Zmc-tyrA-F</i>              | TTATAGGTAAGAGAGGAATGTACACGTGACCGTCTTTAAGCATATTG       |
| <i>Zmc-tyrA-R</i>              | AATCCGTCCTCTCTGCTCTTTTAAGGGTGAATATCGTGGTCT            |
| <i>TamyL-Zmc-tyrA-F</i>        | AGACCACGATATTCACCCTTAAAAGAGCAGAGAGGACGGATT            |
| <i>TamyL-Zmc-tyrA-R</i>        | <b>GCTCTAGACGCAATAATGCCGTCG</b>                       |
| <i>P43-Pap-tyrA-F</i>          | <b>CGGGATCCT</b> GATAGGTGGTATGTTTTCGC                 |
| <i>P43-Pap-tyrA-R</i>          | CGGCGTGACCTCAGTCATGTGTACATTCCCTCTCTTACCTATAA          |
| <i>Pap-tyrA-F</i>              | TTATAGGTAAGAGAGGAATGTACACATGACTGAGGTCACGCCG           |
| <i>Pap-tyrA-R</i>              | AATCCGTCCTCTCTGCTCTTTCAATTGTTCTCCACGGC                |
| <i>TamyL-Pap-tyrA-F</i>        | GCCGTGGAGAACAAATTGAAAGAGCAGAGAGGACGGATT               |
| <i>TamyL-Pap-tyrA-R</i>        | <b>GCTCTAGACGCAATAATGCCGTCG</b>                       |
| <i>PsrfA-Bao-tyrA-F</i>        | <b>CGGGATCCGACGCTCTTCGCAAGGGT</b>                     |
| <i>PsrfA-Bao-tyrA-R</i>        | CAAGCAATATTGTGTCTTCATATTGTCATACCTCCCCTAATCTT          |
| <i>Bao-tyrA-PsrfA-F</i>        | AAGATTAGGGGAGGTATGACAATATGAAGGACACAATATTGCTTG         |
| <i>Bao-tyrA-PsrfA-R</i>        | AATCCGTCCTCTCTGCTCTTTCAGTCAGCGTAAAATGTTTCA            |
| <i>TamyL-PsrfA-Bao-tyrA-F</i>  | TGAAACATTTTACGCTGACTGAAAGAGCAGAGAGGACGGATT            |
| <i>TamyL-PsrfA-Bao-tyrA-R</i>  | <b>GCTCTAGACGCAATAATGCCGTCG</b>                       |
| <i>PytzE-Bao-tyrA-F</i>        | <b>CGGGATCCATCTTGACAATGCCGCTGA</b>                    |
| <i>PytzE-Bao-tyrA-R</i>        | CAAGCAATATTGTGTCTTCATACAACCACTCCCTATCGTATGA           |
| <i>Bao-tyrA-PytzE-F</i>        | TCATACGATAGGGAGTGTTGTATGAAGGACACAATATTGCTTG           |
| <i>Bao-tyrA-PytzE-R</i>        | AATCCGTCCTCTCTGCTCTTTCAGTCAGCGTAAAATGTTTCA            |
| <i>TamyL-PytzE-Bao-tyrA-F:</i> | TGAAACATTTTACGCTGACTGAAAGAGCAGAGAGGACGGATT            |
| <i>TamyL-PytzE-Bao-tyrA-R</i>  | <b>GCTCTAGACGCAATAATGCCGTCG</b>                       |
| <i>PylB-Bao-tyrA-F</i>         | <b>CGGGATCCAGCCGGATTCCTTCAGACT</b>                    |

---

---

|                                     |                                                  |
|-------------------------------------|--------------------------------------------------|
| <i>PylB-Bao-tyrA-R</i>              | CAAGCAATATTGTGTCCTTCATACAAATCTCCCCCTTTGTTG       |
| <i>Bao-tyrA-PylB-F</i>              | CAACAAAGGGGGAGATTTGTATGAAGGACACAATATTGCTTG       |
| <i>Bao-tyrA-PylB-R</i>              | AATCCGTCCTCTCTGCTCTTTCAGTCAGCGTAAATGTTTCA        |
| <i>TamyL-PylB-Bao-tyrA-F</i>        | TGAAACATTTTACGCTGACTGAAAGAGCAGAGAGGACGGATT       |
| <i>TamyL-PylB-Bao-tyrA-R</i>        | <b>GCTCTAGACGCAATAATGCCGTCG</b>                  |
| <i>Pbay-Bao-tyrA-F</i>              | <b>CGGGATCCCCTGCGATTTGCGCGAGA</b>                |
| <i>Pbay-Bao-tyrA-R</i>              | CAAGCAATATTGTGTCCTTCATACAAATCTCCCCCTTTGTTG       |
| <i>Bao-tyrA-Pbay-F</i>              | CAACAAAGGGGGAGATTTGTATGAAGGACACAATATTGCTTG       |
| <i>Bao-tyrA-Pbay-R</i>              | AATCCGTCCTCTCTGCTCTTTCAGTCAGCGTAAATGTTTCA        |
| <i>TamyL-Pbay-Bao-tyrA-F</i>        | TGAAACATTTTACGCTGACTGAAAGAGCAGAGAGGACGGATT       |
| <i>TamyL-Pbay-Bao-tyrA-R</i>        | <b>GCTCTAGACGCAATAATGCCGTCG</b>                  |
| <i>PykzA-Bao-tyrA-F</i>             | <b>CGGGATCCGAAATATTGATGTGACACTTGAAGT</b>         |
| <i>PykzA-Bao-tyrA-R</i>             | CAAGCAATATTGTGTCCTTCATATTTGTATCTAGTTGTTATATTCC   |
| <i>Bao-tyrA-PykzA-F</i>             | GGAAATATAACAACCTAGATACAAATATGAAGGACACAATATTGCTTG |
| <i>Bao-tyrA-PykzA-R</i>             | AATCCGTCCTCTCTGCTCTTTCAGTCAGCGTAAATGTTTCA        |
| <i>TamyL-PykzA-Bao-tyrA-F</i>       | TGAAACATTTTACGCTGACTGAAAGAGCAGAGAGGACGGATT       |
| <i>TamyL-PykzA-Bao-tyrA-R</i>       | <b>GCTCTAGACGCAATAATGCCGTCG</b>                  |
| <i>PykzA+PRBS6-Bao-tyrA-F</i>       | <b>CGGGATCCGAAATATTGATGTGACACTTGAAGT</b>         |
| <i>PykzA+PRBS6-Bao-tyrA-R</i>       | CAAGCAATATTGTGTCCTTCATTGATCCTTCCTCCTTTAGATCT     |
| <i>Bao-tyrA-PykzA+PRBS6-F</i>       | AGATCTAAAGGAGGAAGGATCAATGAAGGACACAATATTGCTTG     |
| <i>Bao-tyrA-PykzA+PRBS6-R</i>       | AATCCGTCCTCTCTGCTCTTTCAGTCAGCGTAAATGTTTCA        |
| <i>TamyL-PykzA+PRBS6-Bao-tyrA-F</i> | TGAAACATTTTACGCTGACTGAAAGAGCAGAGAGGACGGATT       |
| <i>TamyL-PykzA+PRBS6-Bao-tyrA-R</i> | <b>GCTCTAGACGCAATAATGCCGTCG</b>                  |
| <i>PmmgA-Bao-tyrA-F</i>             | <b>CGGGATCCGATTAAGGTAAGGCCGTATACAG</b>           |
| <i>PmmgA-Bao-tyrA-R</i>             | CAAGCAATATTGTGTCCTTCATGGTTTCACCTCATTGAGAAGATA    |
| <i>Bao-tyrA-PmmgA-F</i>             | TATCTTCTGAATGAGGTGAAACCATGAAGGACACAATATTGCTTG    |
| <i>Bao-tyrA-PmmgA-R</i>             | AATCCGTCCTCTCTGCTCTTTCAGTCAGCGTAAATGTTTCA        |
| <i>TamyL-PmmgA-Bao-tyrA-F</i>       | TGAAACATTTTACGCTGACTGAAAGAGCAGAGAGGACGGATT       |
| <i>TamyL-PmmgA-Bao-tyrA-R</i>       | <b>GCTCTAGACGCAATAATGCCGTCG</b>                  |
| <i>PabrB-Bao-tyrA-F</i>             | <b>CGGGATCCCTTGAAACCTCCTAATCAGAATG</b>           |

---

---

|                                 |                                                 |
|---------------------------------|-------------------------------------------------|
| <i>PabrB-Bao-tyrA-R</i>         | CAAGCAATATTGTGTCCTTCATTCTCCTCCCAAGAGATACTTATT   |
| <i>Bao-tyrA-PabrB-F</i>         | AATAAGTATCTCTTGGGAGGAGAATGAAGGACACAATATTGCTTG   |
| <i>Bao-tyrA-PabrB-R</i>         | AATCCGTCCTCTCTGCTCTTTCAGTCAGCGTAAATGTTTCA       |
| <i>TamyL-PabrB-Bao-tyrA-F</i>   | TGAAACATTTTACGCTGACTGAAAGAGCAGAGAGGACGGATT      |
| <i>TamyL-PabrB-Bao-tyrA-R</i>   | <b>GCTCTAGACGCAATAATGCCGTCG</b>                 |
| <i>PbacA-Bao-tyrA-F</i>         | <b>CGGGATCCCCTGCGATTTGCGCGAGA</b>               |
| <i>PbacA-Bao-tyrA-R</i>         | CAAGCAATATTGTGTCCTTCATATAAAAATTCTCCTTTTTGAT     |
| <i>Bao-tyrA-PbacA-F</i>         | ATCAAAAAGGAGAATTTTATATGAAGGACACAATATTGCTTG      |
| <i>Bao-tyrA-PbacA-R</i>         | AATCCGTCCTCTCTGCTCTTTCAGTCAGCGTAAATGTTTCA       |
| <i>TamyL-PbacA-Bao-tyrA-F</i>   | TGAAACATTTTACGCTGACTGAAAGAGCAGAGAGGACGGATT      |
| <i>TamyL-PbacA-Bao-tyrA-R</i>   | <b>GCTCTAGACGCAATAATGCCGTCG</b>                 |
| <i>PUTR12-Bao-tyrA-F</i>        | <b>CGGGATCCTGATAGGTGGTATGTTTTCGC</b>            |
| <i>PUTR12-Bao-tyrA-R</i>        | CAAGCAATATTGTGTCCTTCATTATATATTCCTCCTTTCTAATATAC |
| <i>Bao-tyrA-PUTR12-F</i>        | GTATATTAGAAAGGAGGAATATATAATGAAGGACACAATATTGCTTG |
| <i>Bao-tyrA-PUTR12-R</i>        | AATCCGTCCTCTCTGCTCTTTCAGTCAGCGTAAATGTTTCA       |
| <i>TamyL-PUTR12-Bao-tyrA-F</i>  | TGAAACATTTTACGCTGACTGAAAGAGCAGAGAGGACGGATT      |
| <i>TamyL-PUTR12-Bao-tyrA-R</i>  | <b>GCTCTAGACGCAATAATGCCGTCG</b>                 |
| <i>P43-ylB-Bao-tyrA-F</i>       | <b>CGGGATCCTGATAGGTGGTATGTTTTCGC</b>            |
| <i>P43-ylB-Bao-tyrA-R</i>       | CAAGCAATATTGTGTCCTTCATACAAATCTCCCCCTTTGTTG      |
| <i>Bao-tyrA-P43-ylB-F</i>       | CAACAAAGGGGAGATTGTATGAAGGACACAATATTGCTTG        |
| <i>Bao-tyrA-P43-ylB-R</i>       | AATCCGTCCTCTCTGCTCTTTCAGTCAGCGTAAATGTTTCA       |
| <i>TamyL-P43-ylB-Bao-tyrA-F</i> | TGAAACATTTTACGCTGACTGAAAGAGCAGAGAGGACGGATT      |
| <i>TamyL-P43-ylB-Bao-tyrA-R</i> | <b>GCTCTAGACGCAATAATGCCGTCG</b>                 |
| <i>PR5-Bao-tyrA-F</i>           | <b>CGGGATCCTGATAGGTGGTATGTTTTCGC</b>            |
| <i>PR5-Bao-tyrA-R</i>           | CAAGCAATATTGTGTCCTTCATTGATCCTTCCTCCTTTAGATCTG   |
| <i>Bao-tyrA-PR5-F</i>           | CAGATCTAAAGGAGGAAGGATCAATGAAGGACACAATATTGCTTG   |
| <i>Bao-tyrA-PR5-R</i>           | AATCCGTCCTCTCTGCTCTTTCAGTCAGCGTAAATGTTTCA       |
| <i>TamyL-PR5-Bao-tyrA-F</i>     | TGAAACATTTTACGCTGACTGAAAGAGCAGAGAGGACGGATT      |
| <i>TamyL-PR5-Bao-tyrA-R</i>     | <b>GCTCTAGACGCAATAATGCCGTCG</b>                 |
| <i>PRBS6-Bao-tyrA-F</i>         | <b>CGGGATCCTGATAGGTGGTATGTTTTCGC</b>            |

---

---

|                                 |                                                  |
|---------------------------------|--------------------------------------------------|
| PRBS6- <i>Bao-tyrA</i> -R       | CAAGCAATATTGTGTCCTTCATTGATCCTTCCTCCTTTAGA        |
| <i>Bao-tyrA</i> -PRBS6-F        | TCTAAAGGAGGAAGGATCAATGAAGGACACAATATTGCTTG        |
| <i>Bao-tyrA</i> -PRBS6-R        | AATCCGTCCTCTCTGCTCTTTCAGTCAGCGTAAATGTTTCA        |
| TamyL-PRBS6- <i>Bao-tyrA</i> -F | TGAAACATTTTACGCTGACTGAAAGAGCAGAGAGGACGGATT       |
| TamyL-PRBS6- <i>Bao-tyrA</i> -R | <b>GCTCTAGACGCAATAATGCCGTCG</b>                  |
| P43-UTR1- <i>Bao-tyrA</i> -R1   | GTGTACCTTCCTCTCTGACTTATAATGGTACCGCTATCACTTTATATT |
| P43-UTR1- <i>Bao-tyrA</i> -R2   | CAAGCAATATTGTGTCCTTCATGTGTACCTTCCTCTCTGACTTATAA  |
| <i>Bao-tyrA</i> -UTR1-F         | TTATAAGTCAGAGAGGAAGGTACACATGAAGGACACAATATTGCTTG  |
| <i>Bao-tyrA</i> -UTR1-R         | AATCCGTCCTCTCTGCTCTTTCAGTCAGCGTAAATGTTTCA        |
| TamyL-UTR1- <i>Bao-tyrA</i> -F  | TGAAACATTTTACGCTGACTGAAAGAGCAGAGAGGACGGATT       |
| TamyL-UTR1- <i>Bao-tyrA</i> -R  | <b>GCTCTAGACGCAATAATGCCGTCG</b>                  |
| P43-UTR2- <i>Bao-tyrA</i> -R1   | GTGTACCTTCCTCTCTTACCTATAATGGTACCGCTATCACTTTATATT |
| P43-UTR2- <i>Bao-tyrA</i> -R2   | CAAGCAATATTGTGTCCTTCATGTGTACCTTCCTCTCTTACCTATAA  |
| <i>Bao-tyrA</i> -UTR2-F         | TTATAGGTAAGAGAGGAAGGTACACATGAAGGACACAATATTGCTTG  |
| <i>Bao-tyrA</i> -UTR2-R         | AATCCGTCCTCTCTGCTCTTTCAGTCAGCGTAAATGTTTCA        |
| TamyL-UTR2- <i>Bao-tyrA</i> -F  | TGAAACATTTTACGCTGACTGAAAGAGCAGAGAGGACGGATT       |
| TamyL-UTR2- <i>Bao-tyrA</i> -R  | <b>GCTCTAGACGCAATAATGCCGTCG</b>                  |
| P43-UTR3- <i>Bao-tyrA</i> -R1   | GCGTACCTTCCTCTCTTACTTATAATGGTACCGCTATCACTTTATATT |
| P43-UTR3- <i>Bao-tyrA</i> -R2   | CAAGCAATATTGTGTCCTTCATGCGTACCTTCCTCTCTTACTTATAA  |
| <i>Bao-tyrA</i> -UTR3-F         | TTATAAGTAAGAGAGGAAGGTACGCATGAAGGACACAATATTGCTTG  |
| <i>Bao-tyrA</i> -UTR3-R         | AATCCGTCCTCTCTGCTCTTTCAGTCAGCGTAAATGTTTCA        |
| TamyL-UTR3- <i>Bao-tyrA</i> -F  | TGAAACATTTTACGCTGACTGAAAGAGCAGAGAGGACGGATT       |
| TamyL-UTR3- <i>Bao-tyrA</i> -R  | <b>GCTCTAGACGCAATAATGCCGTCG</b>                  |
| P43-UTR4- <i>Bao-tyrA</i> -R1   | GTGTACCTTCCTCTCTAACTCATAATGGTACCGCTATCACTTTATATT |
| P43-UTR4- <i>Bao-tyrA</i> -R2   | CAAGCAATATTGTGTCCTTCATGTGTACCTTCCTCTCTAACTCATAA  |
| <i>Bao-tyrA</i> -UTR4-F         | TTATGAGTTAGAGAGGAAGGTACACATGAAGGACACAATATTGCTTG  |
| <i>Bao-tyrA</i> -UTR4-R         | AATCCGTCCTCTCTGCTCTTTCAGTCAGCGTAAATGTTTCA        |

---

---

|                                           |                                                  |
|-------------------------------------------|--------------------------------------------------|
| TamyL-UTR4- <i>Bao-t</i><br><i>yrA</i> -F | TGAAACATTTTACGCTGACTGAAAGAGCAGAGAGGACGGATT       |
| TamyL-UTR4- <i>Bao-t</i><br><i>yrA</i> -R | <b>GCTCTAGACGCAATAATGCCGTCG</b>                  |
| P43-UTR5- <i>Bao-tyr</i><br><i>A</i> -R1  | GCGTACCTTCCTCTCTAACCTATAATGGTACCGCTATCACTTTATATT |
| P43-UTR5- <i>Bao-tyr</i><br><i>A</i> -R2  | CAAGCAATATTGTGTCCTTCATGCGTACCTTCCTCTCTAACCTATA   |
| <i>Bao-tyrA</i> -UTR5-F                   | TATAGGTTAGAGAGGAAGGTACGCATGAAGGACACAATATTGCTTG   |
| <i>Bao-tyrA</i> -UTR5-R                   | AATCCGTCCTCTCTGCTCTTTTCAGTCAGCGTAAATGTTTCA       |
| TamyL-UTR5- <i>Bao-t</i><br><i>yrA</i> -F | TGAAACATTTTACGCTGACTGAAAGAGCAGAGAGGACGGATT       |
| TamyL-UTR5- <i>Bao-t</i><br><i>yrA</i> -R | <b>GCTCTAGACGCAATAATGCCGTCG</b>                  |
| P43-UTR6- <i>Bao-tyr</i><br><i>A</i> -R1  | GCGTACCTTCCTCTCTGACTCATAATGGTACCGCTATCACTTTATATT |
| P43-UTR6- <i>Bao-tyr</i><br><i>A</i> -R2  | CAAGCAATATTGTGTCCTTCATGCGTACCTTCCTCTCTGACTC      |
| <i>Bao-tyrA</i> -UTR6-F                   | GAGTCAGAGAGGAAGGTACGCATGAAGGACACAATATTGCTTG      |
| <i>Bao-tyrA</i> -UTR6-R                   | AATCCGTCCTCTCTGCTCTTTTCAGTCAGCGTAAATGTTTCA       |
| TamyL-UTR6- <i>Bao-t</i><br><i>yrA</i> -F | TGAAACATTTTACGCTGACTGAAAGAGCAGAGAGGACGGATT       |
| TamyL-UTR6- <i>Bao-t</i><br><i>yrA</i> -R | <b>GCTCTAGACGCAATAATGCCGTCG</b>                  |

---

Note: Restriction sites highlight in bold.
